# Supplementary material for: A polygenic and family risk score are both independently associated with risk of type 2 diabetes in a population-based study
Source: PubMed Central journal article supplement (PMC10036612; doi:10.1038/s41598-023-31496-w), 2023-03-23

**Supplemental material to**

**A polygenic and family risk score are both independently associated with  
risk of type 2 diabetes in a population-based study**

## Supplementary Methods

### Definition and Calculation of the FamRS

The FamRS was calculated with an algorithm based on the information of a standardized interview.

For each parent and sibling, participant were asked the following question: “Does or did your ... (e.g. father) have one of the following diseases?” with diabetes as one of the diseases in the list. No specification of diabetes subtypes was made. If the question for diabetes was answered with yes, it was followed-up by the question, if it was “before the age of 60”, “at the age of 60 or later” or “age unknown”.

To account for the age of onset, the following weights were included into the formula: Weight = 2 if age <60; Weight = 1 if age ≥60; Weight = 1.5 if age of disease onset is not known

The observed values (O) for each participant were calculated by taking the sum of the weights for all first-grade relatives. The expected values (E) were derived from the mean values of the weights for father, mother, brothers, and sisters for each 10-year age group, respectively. Since KORA F3 is a population-based study, these mean values were considered to be appropriate reference values. The FamRS was then calculated as suggested by Williams and colleagues<sup>1</sup>:

$$\text{If } |O - E| > 0.5 \text{ then FamRS} = \frac{|O - E| - 0.5}{\sqrt{E}} \times \frac{|O - E|}{O - E}$$

or if  $|O - E| \leq 0.5$ , then FamRS=0. If FamRS is  $\geq 1.0$  with only one affected person in the family, FamRS is set to 0.99.

The following categorizations were recommended by Williams et al. [1] ∴ average (FamRS ≤ 0.5), positive (>0.5 to 1.0), strong positive (>1.0 to 2.0), and very strong positive family history (>2.0). These categories can be interpreted like this: average refers to no events in an average or small sized family or one event at an higher age in a large family; positive refers to one event at any age in families of small or average size or one early event in large families; strong positive refers to one early or two events at any age; and very strong positive refers to two or more events at an early age.

[1] Williams RR, Hunt SC, Heiss G, Province MA, Bensen JT, Higgins M, et al. Usefulness of cardiovascular family history data for population-based preventive medicine and medical research (the Health Family Tree Study and the NHLBI Family Heart Study). *Am J Cardiol.* 2001 Jan;87(2):129–35.

## Supplementary Tables

**Table S1:** Absolute and relative amount of participants with T2D in each age group (age at baseline), in subgroups of the PGS and FamRS

| <b>Subgroup</b>                                    | <b>Sample size per subgroup (available for baseline analysis)</b> | <b>Prevalent T2D cases</b> | <b>Sample size per subgroup (available for follow-up analysis)</b> | <b>Incident T2D cases</b> |
|----------------------------------------------------|-------------------------------------------------------------------|----------------------------|--------------------------------------------------------------------|---------------------------|
| <b>Age-groups</b>                                  |                                                                   |                            |                                                                    |                           |
| 35-44                                              | 617                                                               | 6 (1.0%)                   | 549                                                                | 13 (2.4%)                 |
| 45-54                                              | 715                                                               | 18 (2.5%)                  | 635                                                                | 34 (5.34%)                |
| 55-64                                              | 733                                                               | 75 (10.2%)                 | 597                                                                | 46 (7.7%)                 |
| 65-74                                              | 651                                                               | 97 (14.9%)                 | 496                                                                | 45 (9.1%)                 |
| 75-84                                              | 355                                                               | 60 (16.9%)                 | 258                                                                | 25 (9.7%)                 |
| <b>Percentile groups of the PGS</b>                |                                                                   |                            |                                                                    |                           |
| Lower 80% of PGS                                   | 2456                                                              | 65 (2.6%)                  | 2173                                                               | 121 (5.6%)                |
| Upper 20% of PGS                                   | 615                                                               | 191 (31.1%)                | 362                                                                | 42 (11.2%)                |
| Upper 10% of PGS                                   | 308                                                               | 155 (50.3%)                | 126                                                                | 21 (16.7%)                |
| Upper 5% of PGS                                    | 154                                                               | 107 (69.5%)                | 35                                                                 | 9 (25.7%)                 |
| <b>FamRS categories</b>                            |                                                                   |                            |                                                                    |                           |
| Average family risk                                | 2582                                                              | 175 (6.8%)                 | 2175                                                               | 126 (5.8%)                |
| positive and strong positive family risk (FamRS 2) | 343                                                               | 45 (13.1%)                 | 265                                                                | 21 (7.9%)                 |
| very strong positive family risk (FamRS 3)         | 125                                                               | 32 (25.6%)                 | 80                                                                 | 14 (17.5%)                |

**Table S2:** Results of Logistic regression models of the effect of “one of the parents having had T2D” on risk of prevalent and incident diabetes.

|                                                        | Outcome: Prevalent T2D |               |                        | Outcome: Incident T2D |               |         |
|--------------------------------------------------------|------------------------|---------------|------------------------|-----------------------|---------------|---------|
|                                                        | OR                     | CI (95 %)     | p-value                | OR                    | CI (95 %)     | p-value |
| Unadjusted                                             | 2.14                   | [1.64 – 2.79] | $2.13 \times 10^{-8}$  | 1.49                  | [1.05 – 2.08] | 0.0217  |
| Adjusted for Age + Sex + BMI + Physical activity       | 2.68                   | [1.99 – 3.62] | $4.22 \times 10^{-11}$ | 1.67                  | [1.16 – 2.39] | 0.0052  |
| Adjusted for Age + Sex + BMI + Physical activity + PGS | 2.41                   | [1.66 – 3.51] | $4.26 \times 10^{-6}$  | 1.64                  | [1.13 – 2.35] | 0.0080  |

**Table S3:** Area under the curve (AUC) for PGS and FamRS and best discriminating thresholds for prevalent and incident cases.

| Parameter                           | AUC   | 95% CI for AUC using DeLong method | Best discriminating threshold | Specificity for best threshold | Sensitivity for best threshold |
|-------------------------------------|-------|------------------------------------|-------------------------------|--------------------------------|--------------------------------|
| As predictor for prevalent diabetes |       |                                    |                               |                                |                                |
| PGS                                 | 0.869 | [0.842; 0.896]                     | 0.016                         | 0.802                          | 0.820                          |
| FamRS                               | 0.617 | [0.579; 0.655]                     | 0.109                         | 0.840                          | 0.377                          |
| As predictor for incident diabetes  |       |                                    |                               |                                |                                |
| PGS                                 | 0.613 | [0.565; 0.657]                     | -0.053                        | 0.599                          | 0.604                          |
| FamRS                               | 0.539 | [0.490; 0.587]                     | 0.009                         | 0.821                          | 0.280                          |

**Table S4:** Results of Continuous Net Reclassification index (NRI) overall and separated for events and non-events and Integrated Discrimination Improvement (IDI); all measures are given with 95% CI and corresponding p-values

| Base Model                  | NRI   |                                 |                          | NRI events           |        |                                 |                         | NRI nonevents            |       |                                 |                        | IDI   |                         |
|-----------------------------|-------|---------------------------------|--------------------------|----------------------|--------|---------------------------------|-------------------------|--------------------------|-------|---------------------------------|------------------------|-------|-------------------------|
|                             | Index | Lower and upper limit of 95% CI | p-value                  | Increase for events* | Index  | Lower and upper limit of 95% CI | p-value                 | Decrease for non-events† | Index | Lower and upper limit of 95% CI | p-value                | Index | p-value                 |
| <b>Adding PGS</b>           |       |                                 |                          |                      |        |                                 |                         |                          |       |                                 |                        |       |                         |
| Age,sex,BMI, PA             | 1.261 | 1.159<br>1.364                  | 4.42 x10 <sup>-128</sup> | 0.801                | 0.602  | 0.503<br>0.700                  | 8.09 x10 <sup>-33</sup> | 0.830                    | 0.660 | 0.632<br>0.687                  | <1 x10 <sup>-300</sup> | 0.328 | 1.02 x10 <sup>-66</sup> |
| Age,sex,BMI, PA, FamRS      | 1.273 | 1.172<br>1.375                  | 1.42 x10 <sup>-132</sup> | 0.810                | 0.619  | 0.522<br>0.717                  | 2.59 x10 <sup>-35</sup> | 0.827                    | 0.654 | 0.626<br>0.682                  | <1 x10 <sup>-300</sup> | 0.312 | 3.08 x10 <sup>-62</sup> |
| <b>Adding FamRS</b>         |       |                                 |                          |                      |        |                                 |                         |                          |       |                                 |                        |       |                         |
| Age,sex,BMI, PA             | 0.361 | 0.241<br>0.480                  | 3.38 x10 <sup>-09</sup>  | 0.324                | -0.352 | -0.469<br>-0.236                | 3.32 x10 <sup>-09</sup> | 0.856                    | 0.713 | 0.687<br>0.739                  | <1 x10 <sup>-300</sup> | 0.025 | 0.000189                |
| Age,sex,BMI, PA, PGS        | 0.312 | 0.194<br>0.429                  | 2.11 x10 <sup>-07</sup>  | 0.304                | -0.393 | -0.507<br>-0.278                | 1.93 x10 <sup>-11</sup> | 0.852                    | 0.704 | 0.678<br>0.731                  | <1 x10 <sup>-300</sup> | 0.005 | 0.13548                 |
| <b>Adding PGS and FamRS</b> |       |                                 |                          |                      |        |                                 |                         |                          |       |                                 |                        |       |                         |
| Age,sex,BMI, PA             | 1.244 | 1.139<br>1.350                  | 1.83 x10 <sup>-118</sup> | 0.789                | 0.579  | 0.477<br>0.681                  | 6.45 x10 <sup>-29</sup> | 0.833                    | 0.665 | 0.638<br>0.693                  | <1 x10 <sup>-300</sup> | 0.336 | 1.47 x10 <sup>-66</sup> |

\* Proportion of participants with Type 2 Diabetes, for whom probability of having Type 2 diabetes was correctly increased after adding PGS, FamRS or both; † Proportion of participants without Type 2 Diabetes, for whom probability of having Type 2 diabetes was correctly decreased after adding PGS, FamRS or both

# Supplementary Figures

**Figure S1:** Proportion of prevalent T2D cases for number of relatives affected by diabetes

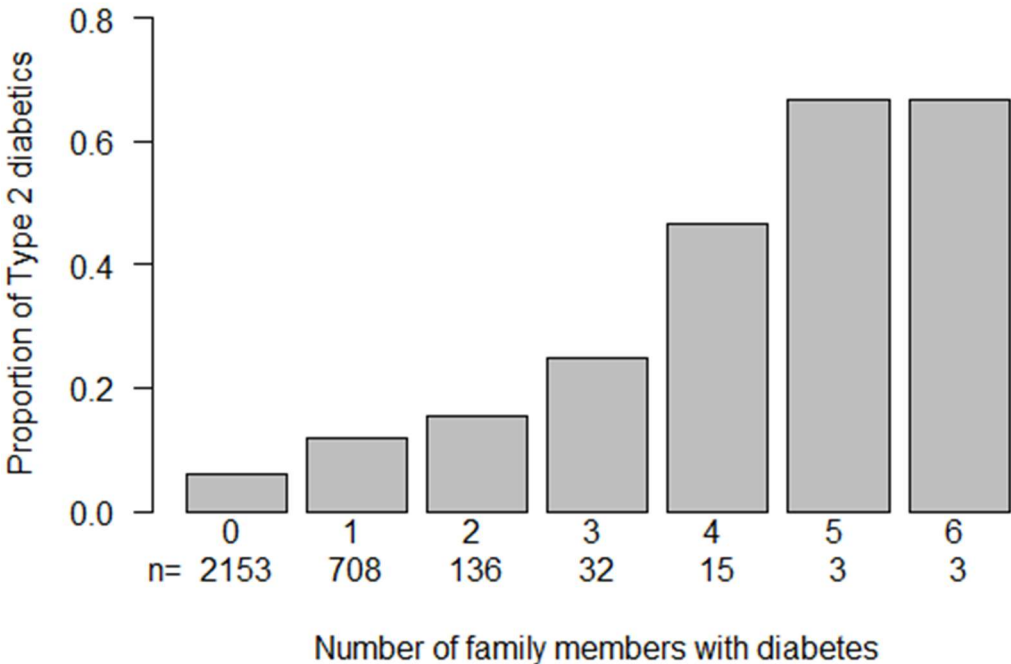

**Figure S2:** Density plot showing the FamRS distribution in individuals who did not (lightblue, panel A) or did (pink, panel B) develop diabetes during the time between the KORA F3 study and the follow-up in 2016 (incident cases); the lines depict the thresholds of the FamRS categories: FamRS > 0.5: positive family risk (blue line), FamRS > 1: strong positive family risk (purple), FamRS > 2: very strong positive family risk (red line).

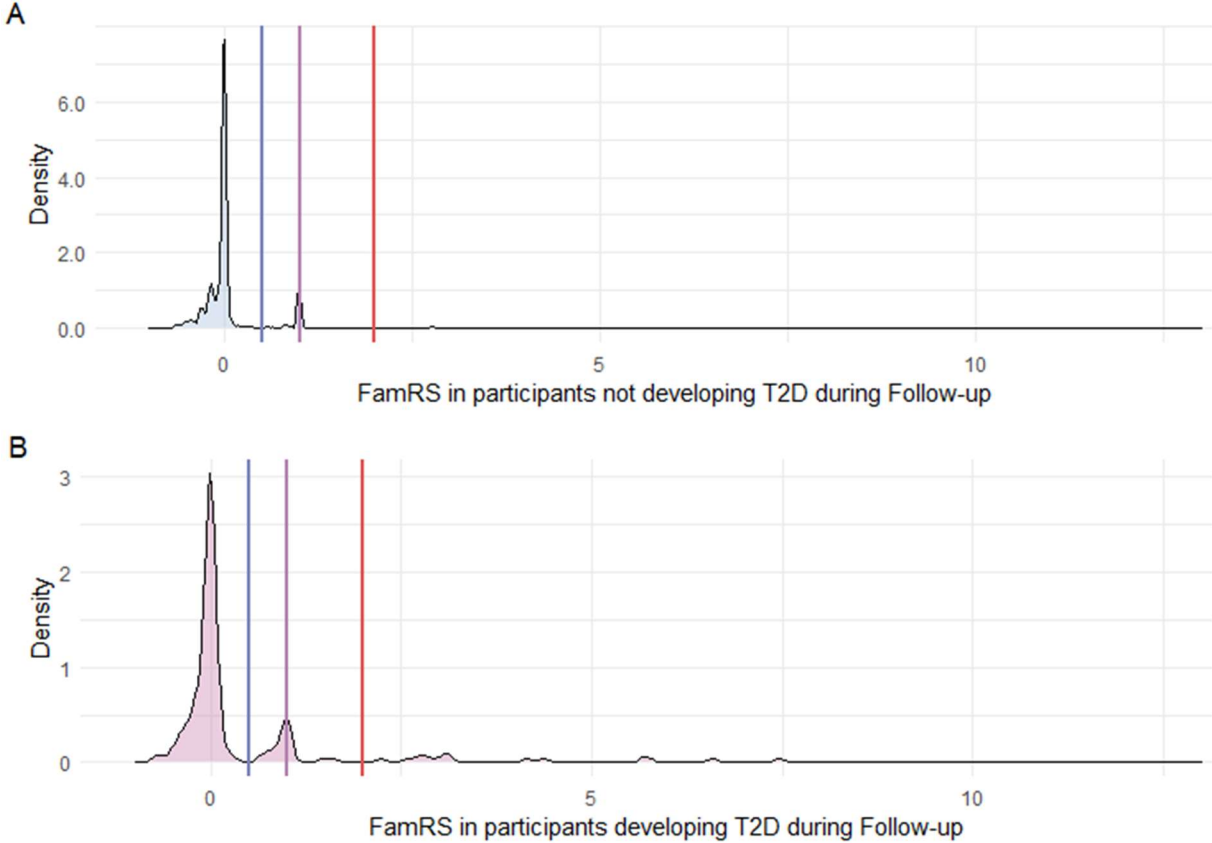

**Figure S3:** Boxplots of the FamRS distribution of participants with T2D in the age groups 35-44, 45-54, 55-64, 65-74 and 75-84 (at baseline) in comparison to the FamRS in participants without T2D.

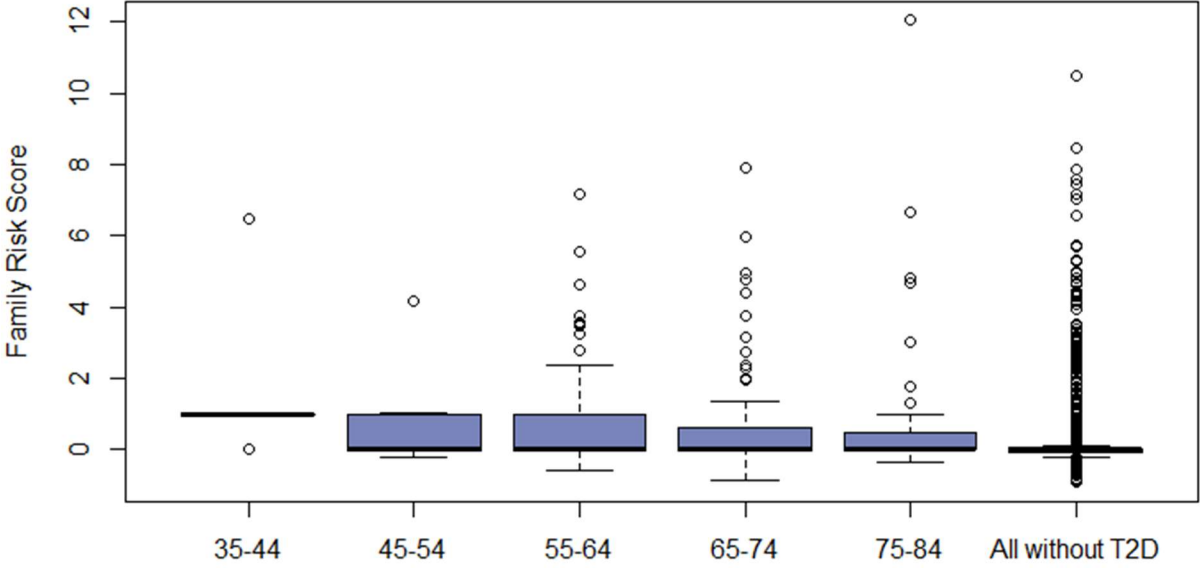

**Figure S4:** Comparison of the distribution of the PGS in the following populations (from top to bottom): South Asian, KORA F3, European, East Asian, American and African population

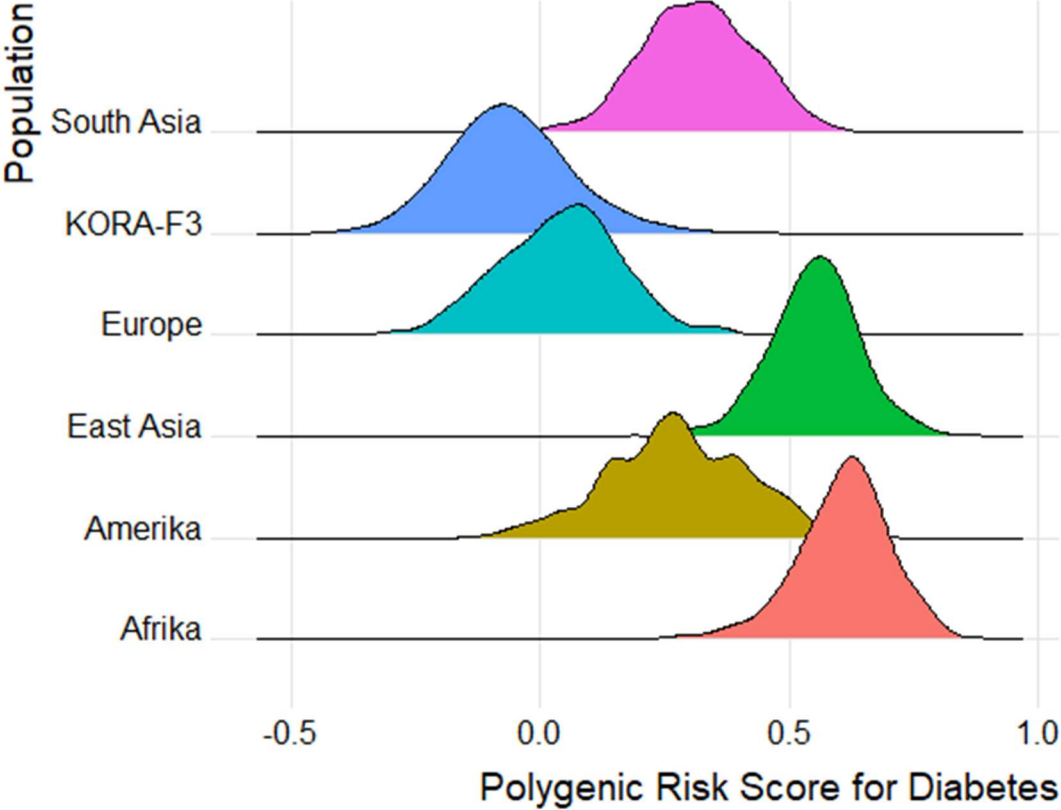



**Figure S5:** Density plot showing the PGS distribution in individuals who did (pink) versus did not (lightblue) develop diabetes during the time between the KORA F3 study and the follow-up in 2016 (incident cases).

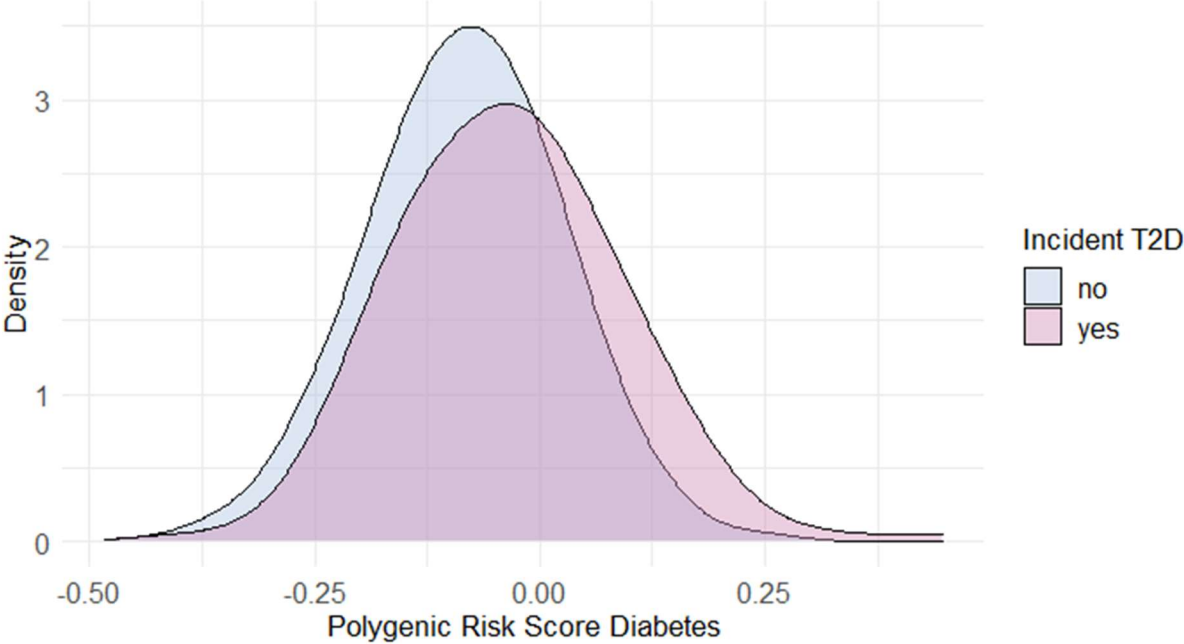

**Figure S6:** Boxplots of the PGS distribution of participants with T2D in the age groups 35-44, 45-54, 55-64, 65-74 and 75-84 (at baseline) in comparison to the PGS in participants without T2D.

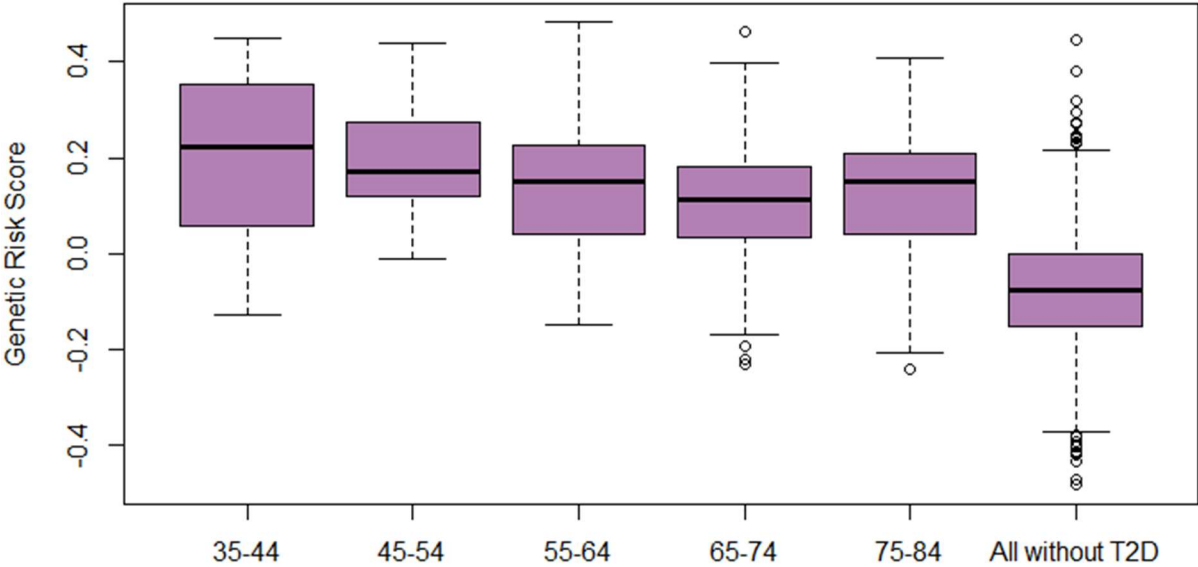

**Figure S7:** Prevalence of Type 2 Diabetes per 100.000 in the following percentile-groups of the PGS: 0-5%, 5-10%, 10-15%, 15-20%, 20-25%, 25-30%, 30-35%, 35-40%, 45%, 45-50%, 50-55%, 55-60%, 60-65%, 65-70%, 70-75%, 75-80%, 80-85%, 85-90%, 90-95%, 95-100% (dot is placed in the middle of the 5%-range).

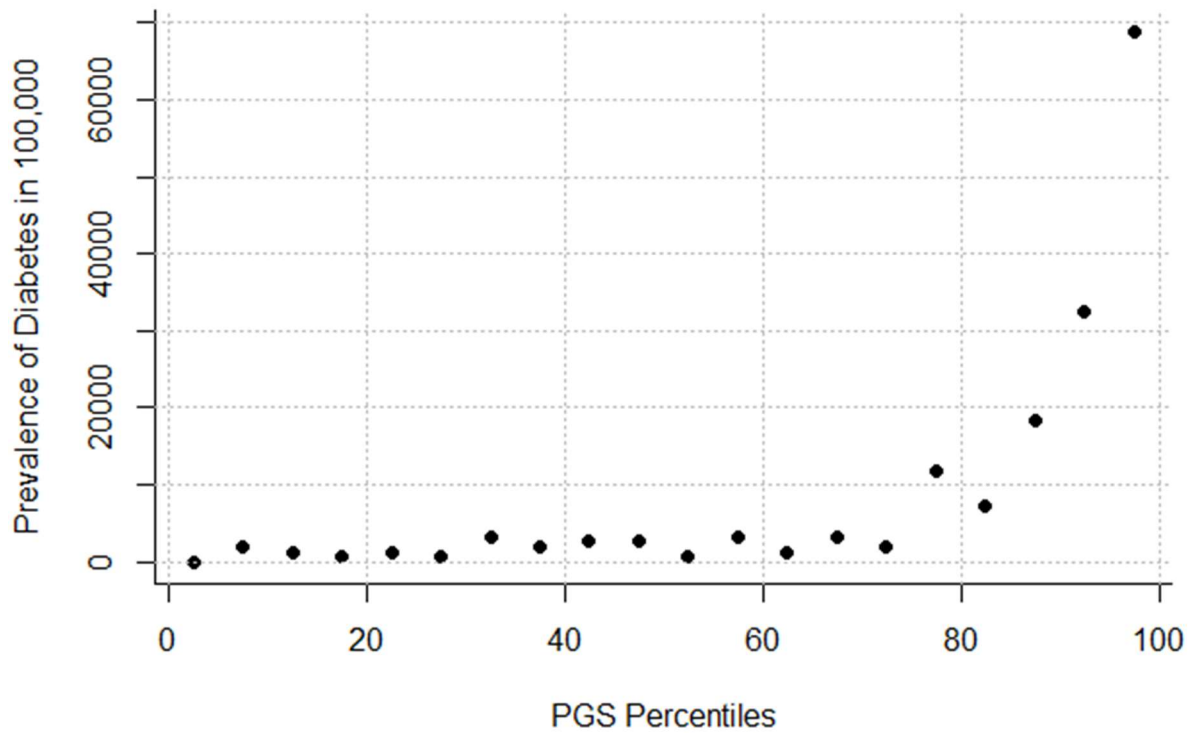

**Figure S8:** PGS distribution depending on the amount of family members affected by diabetes

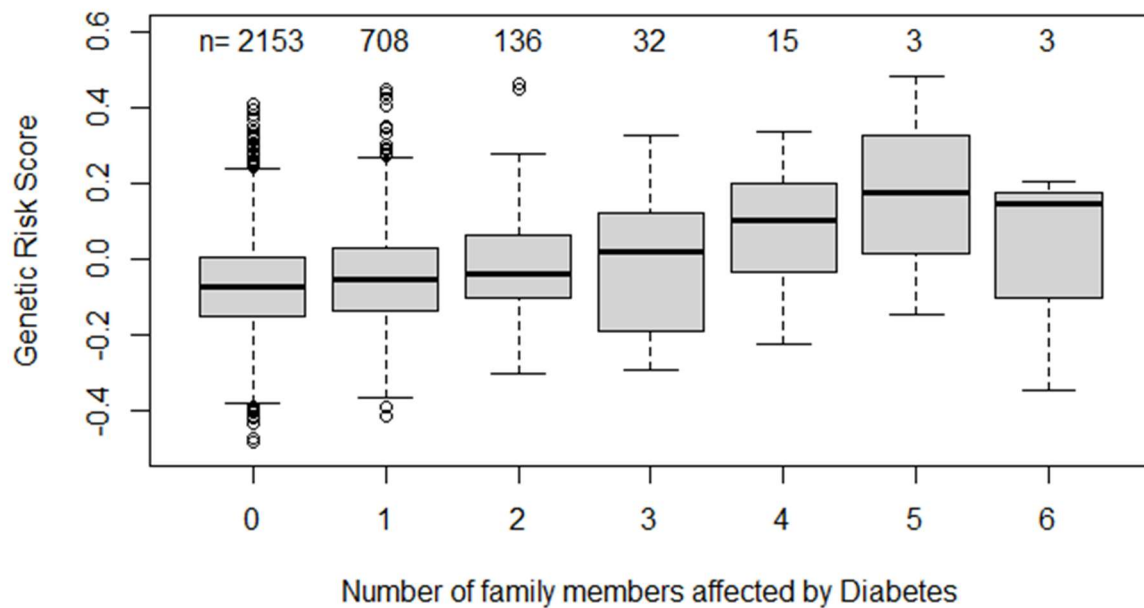

**Figure S9:** Results of logistic regression models of PGS and FamRS on prevalent T2D cases in 10y age-groups; A) ORs for “above average family risk” (FamRS  $\geq 0.5$ ), stratified in 10y age-groups; B) ORs for PGS in 1sd, stratified in 10y age-groups; Results are given for both unadjusted models (black lines) as well as PGS and FamRS mutually adjusted for each other (blue lines).

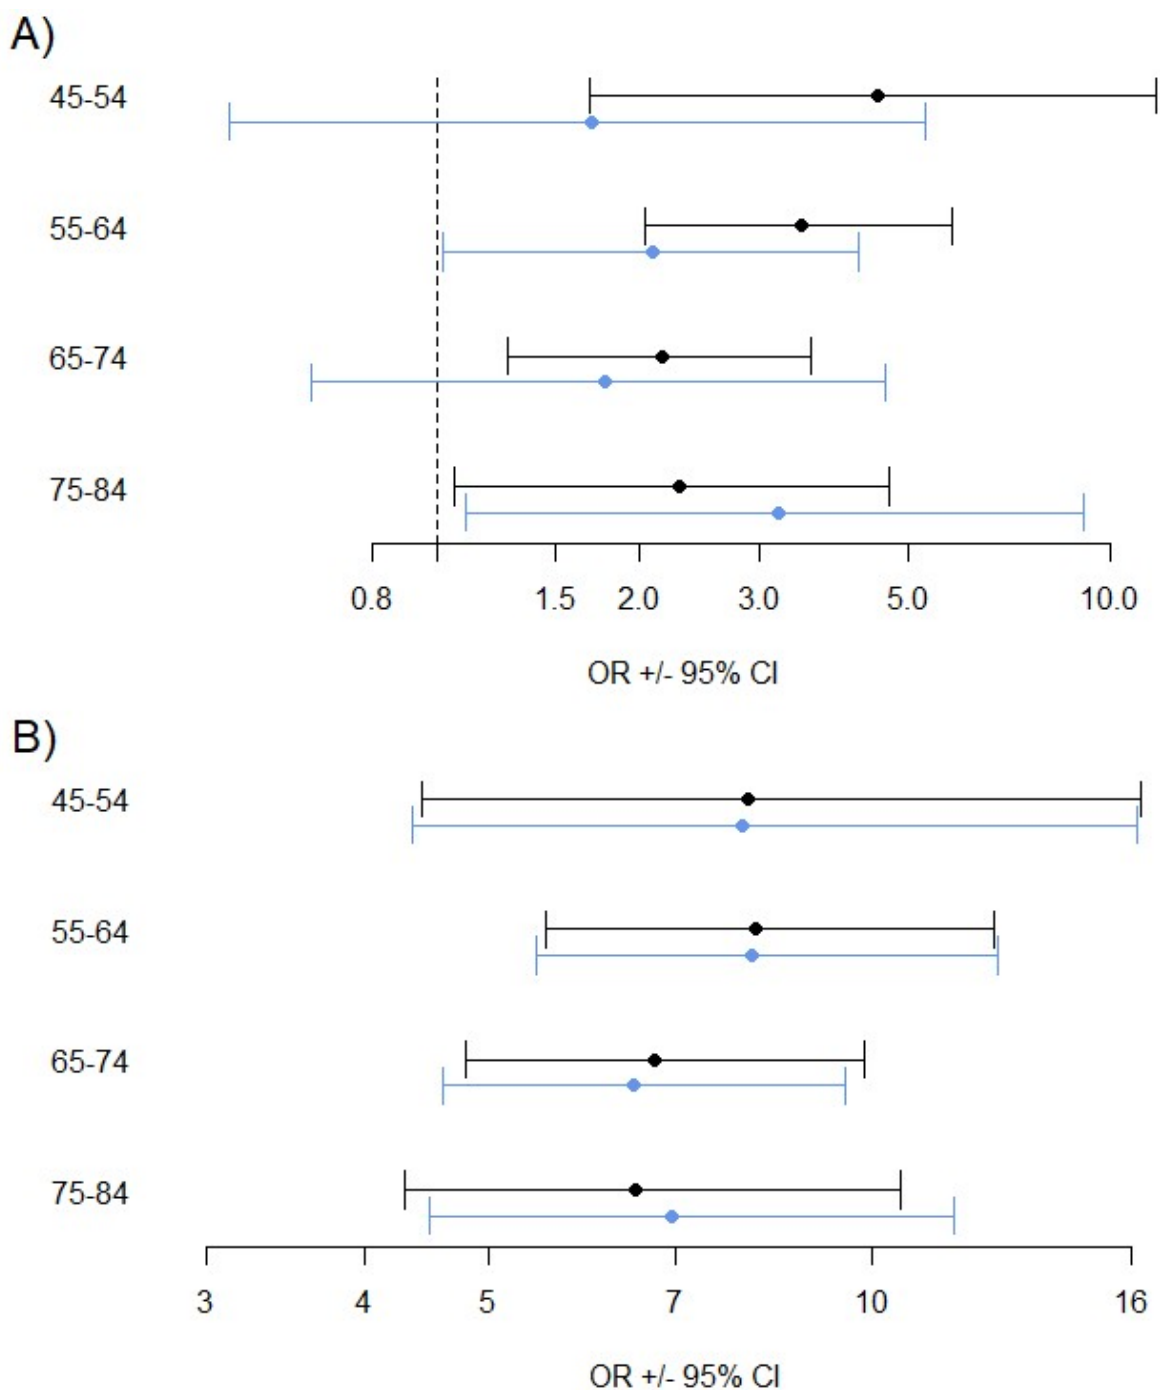

Supplement: 41598_2023_31496_MOESM1_ESM.pdf [file 41598_2023_31496_MOESM1_ESM.pdf]
